# Supplementary material for: Health care seeking in modern urban LMIC settings: evidence from Lusaka, Zambia
Source: Springer Nature journal article supplement (doi:10.1186/s12889-022-13549-3), 2022-06-16
Supplement: MOESM2 [file 23172292]

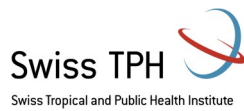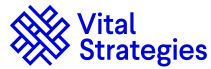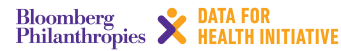

## Survey Survey

### Survey details

[ interviewer\_id ]

**Interviewer name**

Choose only one option:

|                       |          |
|-----------------------|----------|
| <input type="radio"/> | Gracious |
| <input type="radio"/> | Sitwala  |
| <input type="radio"/> | Ruth     |
| <input type="radio"/> | Mundai   |

[ start\_time ]

Start time:

[ end\_time ]

End time:

[ store\_gps ]

**Collect the GPS coordinates of this store.**

Geopoint:

[ selected\_ward ]

**Name of ward**

Choose only one option:

|                       |                       |
|-----------------------|-----------------------|
| <input type="radio"/> | Chaisa                |
| <input type="radio"/> | Chakunkula            |
| <input type="radio"/> | Chawama               |
| <input type="radio"/> | Chilenje              |
| <input type="radio"/> | Harry Mwanga Nkumbula |
| <input type="radio"/> | Idependence           |
| <input type="radio"/> | Justin Kabwe          |
| <input type="radio"/> | Kabulonga             |
| <input type="radio"/> | Kabwata               |
| <input type="radio"/> | Kamwala               |
| <input type="radio"/> | Kanyama               |
| <input type="radio"/> | Kapwepwe              |
| <input type="radio"/> | Lilayi                |
| <input type="radio"/> | Lima                  |
| <input type="radio"/> | Lubwa                 |
| <input type="radio"/> | Matero                |
| <input type="radio"/> | Muchinga              |
| <input type="radio"/> | Munali                |
| <input type="radio"/> | Mwembeshi             |
| <input type="radio"/> | Ngwerere              |
| <input type="radio"/> | Nkoloma               |
| <input type="radio"/> | Raphael               |
| <input type="radio"/> | Roma                  |

[ selected\_ea ]

**Enumeration area**

The choice list of this question (comprising 35 choices) was replaced with a text field due to this question having choice filter and more than 10 choices.

[ audit ]

Audit:

**Socio-demographics**

[ Q0hh ]

**Q0. Head of household?**

Choose only one option:

|                       |                    |
|-----------------------|--------------------|
| <input type="radio"/> | Yes                |
| <input type="radio"/> | No, spouse of head |

[ Q1age ]

**Q1. Respondent's age?**

[ Q2sex ]

**Q2. Record sex as observed**

Choose only one option:

|                       |        |
|-----------------------|--------|
| <input type="radio"/> | Female |
| <input type="radio"/> | Male   |

[ Q3marital\_stat ]

**Q3. What is your current marital status?**

Choose only one option:

|                       |            |
|-----------------------|------------|
| <input type="radio"/> | Married    |
| <input type="radio"/> | Single     |
| <input type="radio"/> | Divorced   |
| <input type="radio"/> | Cohabiting |
| <input type="radio"/> | Separated  |
| <input type="radio"/> | Widow      |

[ Q4edn\_lev ]

**Q4. What is your highest level of education completed?**

Choose only one option:

|                       |                                      |
|-----------------------|--------------------------------------|
| <input type="radio"/> | No, formal schooling                 |
| <input type="radio"/> | Some primary completed               |
| <input type="radio"/> | Primary school completed             |
| <input type="radio"/> | Some secondary completed             |
| <input type="radio"/> | Secondary school completed           |
| <input type="radio"/> | Some college or university completed |
| <input type="radio"/> | College or University completed      |
| <input type="radio"/> | Postgraduated completed              |

[ Q5rlgn ]

**Q5. What is your religion?**

Choose only one option:

|                       |            |
|-----------------------|------------|
| <input type="radio"/> | Catholic   |
| <input type="radio"/> | Protestant |
| <input type="radio"/> | Muslim     |
| <input type="radio"/> | Other      |

• Relevant when:

Q5. What is your religion? = Other .

[ Q5rlgn\_oth ]

**Q5a. Specify other****Household characteristics**

[ Q6drkn\_sour ]

**Q6. What is the main source of drinking water for members of this household?**

Choose only one option:

|                       |                                     |
|-----------------------|-------------------------------------|
| <input type="radio"/> | Piped into dwelling                 |
| <input type="radio"/> | Piped into yard/plot                |
| <input type="radio"/> | Piped to neighbor                   |
| <input type="radio"/> | Public tap/standpipe                |
| <input type="radio"/> | Borehole                            |
| <input type="radio"/> | Protected well                      |
| <input type="radio"/> | Unprotected well                    |
| <input type="radio"/> | Protected spring                    |
| <input type="radio"/> | Unprotected spring                  |
| <input type="radio"/> | Rainwater                           |
| <input type="radio"/> | Tanker truck                        |
| <input type="radio"/> | Surface water (river/dam/lake/pond) |
| <input type="radio"/> | Bottled water                       |
| <input type="radio"/> | Other                               |

• Relevant when:

Q6. What is the main source of drinking water for members of this household? = Other .

[ Q6drkn\_sour\_oth ]

**Q6a. Specify other**

• Relevant when:

Q6. What is the main source of drinking water for members of this household? = Bottled water.

[ Q7other\_wter\_sour ]

**Q7. What is the main source of water used by your household for other purposes such as cooking and handwashing?**

Choose only one option:

|                       |                                     |
|-----------------------|-------------------------------------|
| <input type="radio"/> | Piped into dwelling                 |
| <input type="radio"/> | Piped into yard/plot                |
| <input type="radio"/> | Piped to neighbor                   |
| <input type="radio"/> | Public tap/standpipe                |
| <input type="radio"/> | Borehole                            |
| <input type="radio"/> | Protected well                      |
| <input type="radio"/> | Unprotected well                    |
| <input type="radio"/> | Protected spring                    |
| <input type="radio"/> | Unprotected spring                  |
| <input type="radio"/> | Rainwater                           |
| <input type="radio"/> | Tanker truck                        |
| <input type="radio"/> | Surface water (river/dam/lake/pond) |
| <input type="radio"/> | Bottled water                       |
| <input type="radio"/> | Other                               |

• Relevant when:

Q7. What is the main source of water used by your household for other purposes such as cooking and handwashing? = Other.

[ Q7other\_wter\_sour\_oth ]

**Q7a. Specify other**

• Relevant when:

Q6. What is the main source of drinking water for members of this household? ≠ Piped into dwelling || Q6. What is the main source of drinking water for members of this household? = Piped into yard/plot || Q6. What is the main source of drinking water for members of this household? = Piped to neighbor || Q6. What is the main source of drinking water for members of this household? = Bottled water.

[ Q8water\_lcn ]

**Q8. Where is the water source located?**

Choose only one option:

|                       |                       |
|-----------------------|-----------------------|
| <input type="radio"/> | In your own dwelling  |
| <input type="radio"/> | In your own yard/plot |
| <input type="radio"/> | Elsewhere             |

- Relevant when:

Q8. Where is the water source located? = Elsewhere.

[ Q9water\_time ]

**Q9. How long does it take to get there, wait, get water and come back? Minutes**

- Relevant when:

Q6. What is the main source of drinking water for members of this household? = Piped into dwelling || Q6.  
 What is the main source of drinking water for members of this household? = Piped into yard/plot || Q6. What  
 is the main source of drinking water for members of this household? = Piped to neighbor || Q6. What is the  
 main source of drinking water for members of this household? = Public tab/standpipe || Q6. What is the main  
 source of drinking water for members of this household? = Borehole || Q7. What is the main source of water  
 used by your household for other purposes such as cooking and handwashing? = Piped into dwelling || Q7.  
 What is the main source of water used by your household for other purposes such as cooking and  
 handwashing? = Piped into yard/plot || Q7. What is the main source of water used by your household for other  
 purposes such as cooking and handwashing? = Piped to neighbor || Q7. What is the main source of water used  
 by your household for other purposes such as cooking and handwashing? = Public tab/standpipe || Q7. What is  
 the main source of water used by your household for other purposes such as cooking and  
 handwashing? = Borehole.

[ Q11water\_avbty ]

**Q11. In the past two weeks, was the water from this source not available for at least one full day?**

Choose only one option:

|                       |            |
|-----------------------|------------|
| <input type="radio"/> | Yes        |
| <input type="radio"/> | No         |
| <input type="radio"/> | Don't know |

## • Relevant when:

Q6. What is the main source of drinking water for members of this household? ≠ Piped into dwelling || Q6.  
 What is the main source of drinking water for members of this household? = Piped into yard/plot || Q6. What  
 is the main source of drinking water for members of this household? = Piped to neighbor || Q6. What is the  
 main source of drinking water for members of this household? = Public tap/standpipe || Q6. What is the main  
 source of drinking water for members of this household? = Bottled water || Q6. What is the main source of  
 drinking water for members of this household? = Borehole || Q7. What is the main source of water used by  
 your household for other purposes such as cooking and handwashing? = Piped into dwelling || Q7. What is the  
 main source of water used by your household for other purposes such as cooking and handwashing? = Piped into  
 yard/plot || Q7. What is the main source of water used by your household for other purposes such as cooking  
 and handwashing? = Piped to neighbor || Q7. What is the main source of water used by your household for  
 other purposes such as cooking and handwashing? = Public tap/standpipe || Q7. What is the main source of  
 water used by your household for other purposes such as cooking and handwashing? = Borehole.

[ Q12safe\_wter ]

**Q12. Do you do anything to the water to make it safer to drink?**

Choose only one option:

|                       |            |
|-----------------------|------------|
| <input type="radio"/> | Yes        |
| <input type="radio"/> | No         |
| <input type="radio"/> | Don't know |

## • Relevant when:

Q12. Do you do anything to the water to make it safer to drink? = Yes.

[ Q13mk\_safe ]

**Q13. What do you usually do to make the water safer to drink?**

Choose one or more options:

|                          |                                                 |
|--------------------------|-------------------------------------------------|
| <input type="checkbox"/> | Boil                                            |
| <input type="checkbox"/> | Add bleach/chlorine                             |
| <input type="checkbox"/> | Strain through cloth                            |
| <input type="checkbox"/> | Use water filter(ceramic, sand, composite, etc) |
| <input type="checkbox"/> | Solar disinfection                              |
| <input type="checkbox"/> | Let it stand and settle                         |
| <input type="checkbox"/> | Other                                           |
| <input type="checkbox"/> | Don't know                                      |

• Relevant when:

Q13. What do you usually do to make the water safer to drink? = Don't know.

[ Q13mk\_safe\_oth ]

**Q13a. Specify other**

[ Q14str\_water ]

**Q14. How do you store your drinking water?**

Choose only one option:

|                       |                            |
|-----------------------|----------------------------|
| <input type="radio"/> | Closed container/jerry can |
| <input type="radio"/> | Open container/bucket      |
| <input type="radio"/> | Does not store water       |
| <input type="radio"/> | Other                      |

• Relevant when:

Q14. How do you store your drinking water? = Other.

[ Q14str\_water\_oth ]

**Q14a. Specify other**

## Toilet facility

[ Q15toilet\_typ ]

**Q15. What kind of toilet facility do members of this household usually use?**

Choose only one option:

|                       |                                   |
|-----------------------|-----------------------------------|
| <input type="radio"/> | Flush to piped sewer system       |
| <input type="radio"/> | Flush to septic tank              |
| <input type="radio"/> | Flush to pit latrine              |
| <input type="radio"/> | Flush to somewhere else           |
| <input type="radio"/> | Flush, Don't know where           |
| <input type="radio"/> | Ventilated improved pit latrine   |
| <input type="radio"/> | Pit latrine with slab             |
| <input type="radio"/> | Pit latrine without slab/Open pit |
| <input type="radio"/> | Composting toilet                 |
| <input type="radio"/> | Bucket toilet                     |
| <input type="radio"/> | Hanging toilet/hanging latrine    |
| <input type="radio"/> | No facility/bush/field            |
| <input type="radio"/> | Other                             |



• Relevant when:

Q15. What kind of toilet facility do members of this household usually use? = Other .

[ Q15toilet\_typ\_oth ]

**Q15a. Specify other**

• Relevant when:

Q15. What kind of toilet facility do members of this household usually use? ≠ No facility/bush/field .

[ Q16share\_toilet ]

**Q16. Do you share this facility with other households?**

Choose only one option:

|                       |     |
|-----------------------|-----|
| <input type="radio"/> | Yes |
| <input type="radio"/> | No  |

• Relevant when:

Q16. Do you share this facility with other households? = Yes .

[ Q17hh\_toilet ]

**Q17. Including your own household, how many households use this toilet facility?**

• Relevant when:

Q15. What kind of toilet facility do members of this household usually use? ≠ No facility/bush/field .

[ Q18toilet\_lcn ]

**Q18. Where is this toilet facility located?**

Choose only one option:

|                       |                       |
|-----------------------|-----------------------|
| <input type="radio"/> | In your own dwelling  |
| <input type="radio"/> | In your own yard/plot |
| <input type="radio"/> | Elsewhere             |

## Cooking details

[ Q19fuel\_ckn ]

**Q19. What type of fuel does your household mainly use for cooking?**

Choose only one option:

|                       |                             |
|-----------------------|-----------------------------|
| <input type="radio"/> | Electricity                 |
| <input type="radio"/> | Solar Power                 |
| <input type="radio"/> | Liquid Propane (LP)         |
| <input type="radio"/> | Natural Gas                 |
| <input type="radio"/> | Biogas                      |
| <input type="radio"/> | Kerosene                    |
| <input type="radio"/> | Coal, Lignite               |
| <input type="radio"/> | Charcoal                    |
| <input type="radio"/> | Wood                        |
| <input type="radio"/> | Straw/Shrubs/Grass          |
| <input type="radio"/> | Agricultural Crop           |
| <input type="radio"/> | Animal Dung                 |
| <input type="radio"/> | No food cooked in household |
| <input type="radio"/> | Other                       |

• Relevant when:

Q19. What type of fuel does your household mainly use for cooking? = Wood .

[ Q19fuel\_ckn\_oth ]

**Q19a. Specify other**

• Relevant when:

Q19. What type of fuel does your household mainly use for cooking? ≠ No food cooked in household .

[ Q20ckn\_lcn ]

**Q20. Is the cooking usually done in the house, in a separate building or outdoors?**

Choose only one option:

|                       |                        |
|-----------------------|------------------------|
| <input type="radio"/> | In the house           |
| <input type="radio"/> | In a separate building |
| <input type="radio"/> | Outdoors               |
| <input type="radio"/> | Other                  |

• Relevant when:

Q20. Is the cooking usually done in the house, in a separate building or outdoors? = Answer "96" not found; .

[ Q20ckn\_lcn\_oth ]

**Q20a. Specify other**

• Relevant when:

Q20. Is the cooking usually done in the house, in a separate building or outdoors? = In the house.

[ Q21sp\_ktn ]

**Q21. Do you have a separate room, which is used, as a kitchen?**

Choose only one option:

|                       |     |
|-----------------------|-----|
| <input type="radio"/> | Yes |
| <input type="radio"/> | No  |

## Household possession

[ Q22slp\_room ]

**Q22. How many rooms in this household are used for sleeping?**

[ Q23a\_electric ]

**Q23a. Does your household have electricity?**

Choose only one option:

|                       |     |
|-----------------------|-----|
| <input type="radio"/> | Yes |
| <input type="radio"/> | No  |

[ Q2b\_internet ]

**Q23b. Does your household have access to internet?**

Choose only one option:

|                       |     |
|-----------------------|-----|
| <input type="radio"/> | Yes |
| <input type="radio"/> | No  |

[ Q23c\_bed ]

**Q23c. Does your household have a bed?**

Choose only one option:

|                       |     |
|-----------------------|-----|
| <input type="radio"/> | Yes |
| <input type="radio"/> | No  |

[ Q23d\_table ]

**Q23d. Does your household have a table?**

Choose only one option:

|                       |     |
|-----------------------|-----|
| <input type="radio"/> | Yes |
| <input type="radio"/> | No  |

[ Q23e\_sofa ]

**Q23e.Does your household have a sofa?**

Choose only one option:

|                       |     |
|-----------------------|-----|
| <input type="radio"/> | Yes |
| <input type="radio"/> | No  |

[ Q23f\_radio ]

**Q23f.Does your household have a radio?**

Choose only one option:

|                       |     |
|-----------------------|-----|
| <input type="radio"/> | Yes |
| <input type="radio"/> | No  |

[ Q23g\_tele ]

**Q23g.Does your household have a television?**

Choose only one option:

|                       |     |
|-----------------------|-----|
| <input type="radio"/> | Yes |
| <input type="radio"/> | No  |

[ Q23h\_compt ]

**Q23h.Does your household have a computer/laptop?**

Choose only one option:

|                       |     |
|-----------------------|-----|
| <input type="radio"/> | Yes |
| <input type="radio"/> | No  |

[ Q23i\_fridge ]

**Q23i.Does your household have a refrigerator?**

Choose only one option:

|                       |     |
|-----------------------|-----|
| <input type="radio"/> | Yes |
| <input type="radio"/> | No  |

[ Q23j\_washmach ]

**Q23j.Does your household have a washing machine?**

Choose only one option:

|                       |     |
|-----------------------|-----|
| <input type="radio"/> | Yes |
| <input type="radio"/> | No  |

[ Q23k\_aircon ]

**Q23k.Does your household have an air conditioner?**

Choose only one option:

|                       |     |
|-----------------------|-----|
| <input type="radio"/> | Yes |
| <input type="radio"/> | No  |

[ Q23l\_genet ]

**Q23l.Does your household have a generator?**

Choose only one option:

|                       |     |
|-----------------------|-----|
| <input type="radio"/> | Yes |
| <input type="radio"/> | No  |

[ Q23m\_wave ]

**Q23m.Does your household have a microwave?**

Choose only one option:

|                       |     |
|-----------------------|-----|
| <input type="radio"/> | Yes |
| <input type="radio"/> | No  |

[ Q23n\_heater ]

**Q23n.Does your household have a geyser?**

Choose only one option:

|                       |     |
|-----------------------|-----|
| <input type="radio"/> | Yes |
| <input type="radio"/> | No  |

[ Q24a\_watch ]

**Q24a.Does any member of this household own a watch?**

Choose only one option:

|                       |     |
|-----------------------|-----|
| <input type="radio"/> | Yes |
| <input type="radio"/> | No  |

[ Q24b\_phone ]

**Q24b.Does any member of this household own a mobile phone?**

Choose only one option:

|                       |     |
|-----------------------|-----|
| <input type="radio"/> | Yes |
| <input type="radio"/> | No  |

[ Q24c\_bic ]

**Q24c.Does any member of this household own a bicycle?**

Choose only one option:

|                       |     |
|-----------------------|-----|
| <input type="radio"/> | Yes |
| <input type="radio"/> | No  |

[ Q24d\_motor ]

**Q24d.Does any member of this household own a motorcycle or scooter?**

Choose only one option:

|                       |     |
|-----------------------|-----|
| <input type="radio"/> | Yes |
| <input type="radio"/> | No  |

[ Q24e\_car ]

**Q24e.Does any member of this household own a car or truck?**

Choose only one option:

|                       |     |
|-----------------------|-----|
| <input type="radio"/> | Yes |
| <input type="radio"/> | No  |

[ Q25bank ]

**Q25.Does any member of this household own a bank account?**

Choose only one option:

|                       |     |
|-----------------------|-----|
| <input type="radio"/> | Yes |
| <input type="radio"/> | No  |

## Materials of housing

[ Q26flr\_mat ]

**Q26.Observe the main material of the floor of the dwelling**

Choose only one option:

|                       |                       |
|-----------------------|-----------------------|
| <input type="radio"/> | Earth/sand            |
| <input type="radio"/> | Dung                  |
| <input type="radio"/> | Wood Planks           |
| <input type="radio"/> | Palm/Bamboo           |
| <input type="radio"/> | Wooden floor          |
| <input type="radio"/> | Vinyl (PVC)           |
| <input type="radio"/> | Ceramic/terazzo tiles |
| <input type="radio"/> | Cement                |
| <input type="radio"/> | Carpet                |
| <input type="radio"/> | Other                 |

• Relevant when:

Q26.Observe the main material of the floor of the dwelling = Other.

[ Q26flr\_mat\_other ]

**Q26a.Specify other**

[ Q27rof\_mat ]

**Q27.Observe the main material of the roof of the dwelling**

Choose only one option:

|                       |                            |
|-----------------------|----------------------------|
| <input type="radio"/> | No roof                    |
| <input type="radio"/> | Thatch/Palm leaf           |
| <input type="radio"/> | Rustic Mat                 |
| <input type="radio"/> | Palm/Bamboo                |
| <input type="radio"/> | Wood Planks                |
| <input type="radio"/> | Cardboard                  |
| <input type="radio"/> | Metal/Iron sheets          |
| <input type="radio"/> | Wood                       |
| <input type="radio"/> | Calamine/Cement Fiber      |
| <input type="radio"/> | Ceramic Tiles/Harvey tiles |
| <input type="radio"/> | Cement                     |
| <input type="radio"/> | Roofing shingles           |
| <input type="radio"/> | Mud tiles                  |
| <input type="radio"/> | Asbestos                   |
| <input type="radio"/> | Other                      |

• Relevant when:

Q27.Observe the main material of the roof of the dwelling = Other .

[ Q27rof\_mat\_other ]

**Q27a.Specify other**

[ Q28type\_wall ]

**Q28.Observe the main material of the exterior walls of the dwelling**

Choose only one option:

|                       |                        |
|-----------------------|------------------------|
| <input type="radio"/> | No walls               |
| <input type="radio"/> | Cane/Palm/Trunks       |
| <input type="radio"/> | Mud tiles              |
| <input type="radio"/> | Mudbrick               |
| <input type="radio"/> | Bamboo with mud        |
| <input type="radio"/> | Stone with mud         |
| <input type="radio"/> | Plywood                |
| <input type="radio"/> | Cardboard              |
| <input type="radio"/> | Reused wood            |
| <input type="radio"/> | Cement                 |
| <input type="radio"/> | Stone with lime/Cement |
| <input type="radio"/> | Burned bricks          |
| <input type="radio"/> | Cement blocks          |
| <input type="radio"/> | Wood planks/shingles   |
| <input type="radio"/> | Other                  |

• Relevant when:

Q28.Observe the main material of the exterior walls of the dwelling = Other .

[ Q28type\_wall\_other ]

**Q28a.Specify other****Overall health status**

[ Q29hlth\_status ]

**Q29.Overall, how would you rate your health status**

Choose only one option:

|                       |           |
|-----------------------|-----------|
| <input type="radio"/> | Very good |
| <input type="radio"/> | Good      |
| <input type="radio"/> | Moderate  |
| <input type="radio"/> | Bad       |
| <input type="radio"/> | Very bad  |



## Health facility visit

[ Q30visit\_outpt ]

**Q30. In the past 12 months, how many times did you seek care at a clinic or hospital? (only for outpatient visit)**

[ Q31last\_visit ]

**Q31. How long ago was your last visit to a clinic or hospital?**

[ Q32reson\_visit ]

**Q32. What was the main reason for your last visit?**

Choose only one option:

|                       |                                       |
|-----------------------|---------------------------------------|
| <input type="radio"/> | Emergency, Accident or Injury         |
| <input type="radio"/> | Check up or preventive care           |
| <input type="radio"/> | Follow up on existing chronic problem |
| <input type="radio"/> | New health issue                      |

[ Q33nme\_fac ]

**Q33. What was the name of the facility?**

[ Q33a\_nbhd\_fac ]

**Q3a. Which neighborhood is the facility located in?**

[ Q33b\_typ\_fac ]

**Q33b. What type of health facility was it?**

Choose only one option:

|                       |                          |
|-----------------------|--------------------------|
| <input type="radio"/> | Government Health center |
| <input type="radio"/> | Government Hospital      |
| <input type="radio"/> | Mission hospital         |
| <input type="radio"/> | Pharmacy                 |
| <input type="radio"/> | Private clinic/hospital  |
| <input type="radio"/> | Don't know               |
| <input type="radio"/> | Other                    |

• Relevant when:

[ Q33b. What type of health facility was it? ] = [ Other ] .

[ Q33b\_typ\_fac\_other ]

**Q33ba. Specify other**

[ Q33c\_txt\_spend ]

**Q33c.Overall, how much did you spend for the treatment of the illness (including drugs at the pharmacies)?****Thinking about your last health facility visit (not including overnight stays)  
how would you rate the following:**

[ Q34length\_wait ]

**Q34.The length of time you waited before you were seen**

Choose only one option:

|                       |           |
|-----------------------|-----------|
| <input type="radio"/> | Excellent |
| <input type="radio"/> | Very good |
| <input type="radio"/> | Good      |
| <input type="radio"/> | Fair      |
| <input type="radio"/> | Poor      |

[ Q35provid\_listen ]

**Q35.Whether the health provider listened to you carefully**

Choose only one option:

|                       |           |
|-----------------------|-----------|
| <input type="radio"/> | Excellent |
| <input type="radio"/> | Very good |
| <input type="radio"/> | Good      |
| <input type="radio"/> | Fair      |
| <input type="radio"/> | Poor      |

[ Q36provider\_knlg ]

**Q36.The health provider's medical knowledge and skills**

Choose only one option:

|                       |           |
|-----------------------|-----------|
| <input type="radio"/> | Excellent |
| <input type="radio"/> | Very good |
| <input type="radio"/> | Good      |
| <input type="radio"/> | Fair      |
| <input type="radio"/> | Poor      |

[ Q37provider\_respt ]

**Q37.The level of respect the provider showed you**

Choose only one option:

|                       |           |
|-----------------------|-----------|
| <input type="radio"/> | Excellent |
| <input type="radio"/> | Very good |
| <input type="radio"/> | Good      |
| <input type="radio"/> | Fair      |
| <input type="radio"/> | Poor      |

[ Q38provider\_time ]

**Q38.The amount of time the provider spent with you in the visit.**

Choose only one option:

|                       |           |
|-----------------------|-----------|
| <input type="radio"/> | Excellent |
| <input type="radio"/> | Very good |
| <input type="radio"/> | Good      |
| <input type="radio"/> | Fair      |
| <input type="radio"/> | Poor      |

[ Q39overall\_care ]

**Q39.Overall, considering everything, how would you rate the quality of care you received?**

Choose only one option:

|                       |           |
|-----------------------|-----------|
| <input type="radio"/> | Excellent |
| <input type="radio"/> | Very good |
| <input type="radio"/> | Good      |
| <input type="radio"/> | Fair      |
| <input type="radio"/> | Poor      |

[ Q40overall\_visit ]

**Q40.Overall, thinking about your entire visit, how would you rate the care you received?**

Choose only one option:

|                       |           |
|-----------------------|-----------|
| <input type="radio"/> | Excellent |
| <input type="radio"/> | Very good |
| <input type="radio"/> | Good      |
| <input type="radio"/> | Fair      |
| <input type="radio"/> | Poor      |

**Child health**

[ Q41has\_child ]

**Q41.Are there any children under age five living in this household?**

Choose only one option:

|                       |     |
|-----------------------|-----|
| <input type="radio"/> | Yes |
| <input type="radio"/> | No  |

• Relevant when:

Q41.Are there any children under age five living in this household? = Yes .

[ Q41a\_childn ]

**Q41a.How many are there?**

• Relevant when:

Q41.Are there any children under age five living in this household? = Yes .

**child info**

| Question                                                                                                                                     | Element 1 | Element 2 | Element 3 | Element 4 | Element 5 |
|----------------------------------------------------------------------------------------------------------------------------------------------|-----------|-----------|-----------|-----------|-----------|
| [ Q42name_child ]<br><b>Q42.Name of child</b>                                                                                                |           |           |           |           |           |
| [ Q42sex_child ]<br><b>Q42.Sex of child</b><br>Choose only one option:<br>Female<br>Male                                                     |           |           |           |           |           |
| [ Q42date_child ]<br><b>Q42.Date of birth</b><br>Date: __ / __ / ____ (DD/MM/YYYY)                                                           |           |           |           |           |           |
| [ Q43diarrhea ]<br><b>Q42.Has (name) had diarrhea at any time in the last 2 weeks?</b><br>Choose only one option:<br>Yes<br>No<br>Don't know |           |           |           |           |           |

| Question                                                                                                                                                                                                                                                                                                                                                                                                                                                                                                                                                                                                                                                                                                                          | Element 1 | Element 2 | Element 3 | Element 4 | Element 5 |
|-----------------------------------------------------------------------------------------------------------------------------------------------------------------------------------------------------------------------------------------------------------------------------------------------------------------------------------------------------------------------------------------------------------------------------------------------------------------------------------------------------------------------------------------------------------------------------------------------------------------------------------------------------------------------------------------------------------------------------------|-----------|-----------|-----------|-----------|-----------|
| <p>[ Q44fever ]</p> <p><b>Q44.Has (name) been ill with a fever any time in the last 2 weeks?</b></p> <p>Choose only one option:</p> <input type="text" value="Yes"/> <input type="text" value="No"/> <input type="text" value="Don't know"/>                                                                                                                                                                                                                                                                                                                                                                                                                                                                                      |           |           |           |           |           |
| <p>[ Q45cough ]</p> <p><b>Q45.Has (name) had an illness with a cough at any time in the last 2 weeks?</b></p> <p>Choose only one option:</p> <input type="text" value="Yes"/> <input type="text" value="No"/> <input type="text" value="Don't know"/>                                                                                                                                                                                                                                                                                                                                                                                                                                                                             |           |           |           |           |           |
| <p>[ Q46fastbreath ]</p> <p><b>Q45.Has (name) had fast, short, rapid breaths or difficulty breathing at any time in the last 2 weeks?</b></p> <p>Choose only one option:</p> <input type="text" value="Yes"/> <input type="text" value="No"/> <input type="text" value="Don't know"/>                                                                                                                                                                                                                                                                                                                                                                                                                                             |           |           |           |           |           |
| <p>• Relevant when:</p> <p><a href="#">Q42.Has (name) had diarrhea at any time in the last 2 weeks?</a> = <input type="text" value="Yes"/> <input checked="" type="checkbox"/> <a href="#">Q44.Has (name) been ill with a fever any time in the last 2 weeks?</a> = <input type="text" value="Yes"/> <input checked="" type="checkbox"/> <a href="#">Q45.Has (name) had an illness with a cough at any time in the last 2 weeks?</a> = <input type="text" value="Yes"/>.</p> <p>[ Q47advice_chd ]</p> <p><b>Q47.Did you seek advice or treatment for the illness from any source?</b></p> <p>Choose only one option:</p> <input type="text" value="Yes"/> <input type="text" value="No"/> <input type="text" value="Don't know"/> |           |           |           |           |           |
|                                                                                                                                                                                                                                                                                                                                                                                                                                                                                                                                                                                                                                                                                                                                   |           |           |           |           |           |

| Question                                                                                                                                                                                                                                                                                                                                                                                                                                                                                                                                                         | Element 1                | Element 2           | Element 3        | Element 4 | Element 5               |            |       |  |  |  |  |  |
|------------------------------------------------------------------------------------------------------------------------------------------------------------------------------------------------------------------------------------------------------------------------------------------------------------------------------------------------------------------------------------------------------------------------------------------------------------------------------------------------------------------------------------------------------------------|--------------------------|---------------------|------------------|-----------|-------------------------|------------|-------|--|--|--|--|--|
| <p>• Relevant when:<br/> <a href="#">Q47.Did you seek advice or treatment for the illness from any source?</a> = <input type="checkbox"/> Yes .</p> <p>[ Q48name_trxtchd ]<br/> <b>Q48.What was the name of the place you sought treatment?</b></p>                                                                                                                                                                                                                                                                                                              |                          |                     |                  |           |                         |            |       |  |  |  |  |  |
| <p>• Relevant when:<br/> <a href="#">Q47.Did you seek advice or treatment for the illness from any source?</a> = <input type="checkbox"/> Yes .</p> <p>[ Q49typfac_chd ]<br/> <b>Q49.What type of facility was it?</b></p> <p>Choose only one option:</p> <table border="1" data-bbox="162 848 852 1159"> <tr><td>Government Health center</td></tr> <tr><td>Government Hospital</td></tr> <tr><td>Mission hospital</td></tr> <tr><td>Pharmacy</td></tr> <tr><td>Private clinic/hospital</td></tr> <tr><td>Don't know</td></tr> <tr><td>Other</td></tr> </table> | Government Health center | Government Hospital | Mission hospital | Pharmacy  | Private clinic/hospital | Don't know | Other |  |  |  |  |  |
| Government Health center                                                                                                                                                                                                                                                                                                                                                                                                                                                                                                                                         |                          |                     |                  |           |                         |            |       |  |  |  |  |  |
| Government Hospital                                                                                                                                                                                                                                                                                                                                                                                                                                                                                                                                              |                          |                     |                  |           |                         |            |       |  |  |  |  |  |
| Mission hospital                                                                                                                                                                                                                                                                                                                                                                                                                                                                                                                                                 |                          |                     |                  |           |                         |            |       |  |  |  |  |  |
| Pharmacy                                                                                                                                                                                                                                                                                                                                                                                                                                                                                                                                                         |                          |                     |                  |           |                         |            |       |  |  |  |  |  |
| Private clinic/hospital                                                                                                                                                                                                                                                                                                                                                                                                                                                                                                                                          |                          |                     |                  |           |                         |            |       |  |  |  |  |  |
| Don't know                                                                                                                                                                                                                                                                                                                                                                                                                                                                                                                                                       |                          |                     |                  |           |                         |            |       |  |  |  |  |  |
| Other                                                                                                                                                                                                                                                                                                                                                                                                                                                                                                                                                            |                          |                     |                  |           |                         |            |       |  |  |  |  |  |
| <p>• Relevant when:<br/> <a href="#">Q47.Did you seek advice or treatment for the illness from any source?</a> = <input type="checkbox"/> Yes .</p> <p>[ Q50nbhd_child ]<br/> <b>Q50.What neighborhood is it located in?</b></p>                                                                                                                                                                                                                                                                                                                                 |                          |                     |                  |           |                         |            |       |  |  |  |  |  |

| Question                                                                                                                                                                                                                                                                                                                                                                                                                  | Element 1 | Element 2 | Element 3 | Element 4 | Element 5 |
|---------------------------------------------------------------------------------------------------------------------------------------------------------------------------------------------------------------------------------------------------------------------------------------------------------------------------------------------------------------------------------------------------------------------------|-----------|-----------|-----------|-----------|-----------|
| <p>• Relevant when:<br/> <a href="#">Q47.Did you seek advice or treatment for the illness from any source?</a> = <input type="checkbox"/> Yes .</p> <p>[ Q51antimal_drug ]<br/> <b>Q51.At any time during the illness, did (Name) get antimalarial for the illness?</b></p> <p>Choose only one option:</p> <input type="text" value="Yes"/><br><input type="text" value="No"/><br><input type="text" value="Don't know"/> |           |           |           |           |           |
| <p>• Relevant when:<br/> <a href="#">Q47.Did you seek advice or treatment for the illness from any source?</a> = <input type="checkbox"/> Yes .</p> <p>[ Q52antibio_drug ]<br/> <b>Q52.At any time during the illness, did (Name) get antibiotics for the illness?</b></p> <p>Choose only one option:</p> <input type="text" value="Yes"/><br><input type="text" value="No"/><br><input type="text" value="Don't know"/>  |           |           |           |           |           |
| <p>• Relevant when:<br/> <a href="#">Q47.Did you seek advice or treatment for the illness from any source?</a> = <input type="checkbox"/> Yes .</p> <p>[ Q52atrxtcost ]<br/> <b>Q52.Overall, how much did you spend for the treatment of the illness (including drugs at the pharmacies)?</b></p>                                                                                                                         |           |           |           |           |           |

## General facility access

[ Q53nbd\_par ]  
**Q53.What is the name of the closest drug shop or pharmacy from your house?**

• Relevant when:

Q53.What is the name of the closest drug shop or pharmacy from your house? ≠ 88.

[ Q53a\_nbhd\_phar ]

**Q53a.Which neighborhood is this drug shop or pharmacy located?**

• Relevant when:

Q53.What is the name of the closest drug shop or pharmacy from your house? ≠ 88.

[ Q53b\_walk\_phar ]

**Q53b.How long does it take to walk from your house to the drug shop or pharmacy? (assuming you don't stop and walk fast) (minutes)**

[ Q54privt\_fac ]

**Q54.What is the name of the closest private health facility from your house?**

• Relevant when:

Q54.What is the name of the closest private health facility from your house? ≠ 88.

[ Q54a\_nbhd\_priv ]

**Q54a.Which neighborhood is this private health facility located?**

• Relevant when:

Q54.What is the name of the closest private health facility from your house? ≠ 88.

[ Q54b\_walk\_priv ]

**Q54b.How long does it take walk from here to this private health facility? (assuming you don't stop and walk fast) (minutes)**

[ Q55\_govtfac ]

**Q55.What is the name of the closest government health facility from your house?**

• Relevant when:

Q55.What is the name of the closest government health facility from your house? ≠ 88.

[ Q55nbhd\_govtfac ]

**Q55a.Which neighborhood is this government health facility located?**



• Relevant when:

Q55.What is the name of the closest government health facility from your house? ≠ 88.

[ Q55b\_walk\_govtfac ]

**Q55b.How long does it take to walk from here to this government facility? (assuming you don't stop and walk fast)**

[ Q56month\_expd ]

**Q56.On an average, how much does your household spend each month on healthcare (all members combined, including drugs, treatment and transport)?**

[ Q57lge\_expd ]

**Q57.What was the largest health-related expenditure your household had last year and how much did you pay in total, including drugs, treatment and transport?**

• Relevant when:

Q57.What was the largest health-related expenditure your household had last year and how much did you pay in total, including drugs, treatment and transport? > 0.

[ Q57a\_med\_prob ]

**Q57a.What was the problem?**

• Relevant when:

Q57.What was the largest health-related expenditure your household had last year and how much did you pay in total, including drugs, treatment and transport? > 0.

[ Q57b\_date\_medprob ]

**Q57b.When did this occur?**

Date: \_\_ / \_\_ / \_\_\_\_ (DD/MM/YYYY)

• Relevant when:

Q57.What was the largest health-related expenditure your household had last year and how much did you pay in total, including drugs, treatment and transport? > 0.

[ Q57c\_txrtcost ]

**Q57c.What was the total treatment cost? (cost of diagnosis, treatment and drugs)**

[ Q57d\_pharm ]

**Q57d. How much of this money did you spend at the pharmacy or private drug store?**

[ Q57e\_diagnos ]

**Q57e. How much of this money did you spend for diagnostics elsewhere?**

[ O57f\_hf ]

**Q57f. How much of this money did you spend at the actual health facility?**

[ Q57g\_nonhthcost ]

**Q57g. What was the total cost of non-health related cost? (Transport)**

• Relevant when:

Q57. What was the largest health-related expenditure your household had last year and how much did you pay in total, including drugs, treatment and transport? > 0.

[ Q57h\_make\_paymt ]

**Q57h. How did you make the payment?**

Choose only one option:

|                       |                                 |
|-----------------------|---------------------------------|
| <input type="radio"/> | Paid myself                     |
| <input type="radio"/> | Borrowed from family or friends |
| <input type="radio"/> | Sold assets                     |
| <input type="radio"/> | Did not pay                     |

## Confidence and trust

[ Q58confid\_pub ]

**Q58. How confident are you that if you become very sick tomorrow, you would be able to receive effective treatment from the public health facilities?**

Choose only one option:

|                       |                      |
|-----------------------|----------------------|
| <input type="radio"/> | Not at all confident |
| <input type="radio"/> | Not very confident   |
| <input type="radio"/> | Somewhat confident   |
| <input type="radio"/> | Very confident       |

[ Q59confid\_priv ]

**Q59.How confident are you that if you become very sick tomorrow, you would be able to receive effective treatment from the private health facilities?**

Choose only one option:

|                       |                      |
|-----------------------|----------------------|
| <input type="radio"/> | Not at all confident |
| <input type="radio"/> | Not very confident   |
| <input type="radio"/> | Somewhat confident   |
| <input type="radio"/> | Very confident       |

[ Q60trust\_govt ]

**Q60.How much of the time do you think you can trust the National government to do what is right?**

Choose only one option:

|                       |                  |
|-----------------------|------------------|
| <input type="radio"/> | Always           |
| <input type="radio"/> | Most of the time |
| <input type="radio"/> | Some of the time |
| <input type="radio"/> | Hardly ever      |
| <input type="radio"/> | Never            |

[ Q61hlthsec\_rate ]

**Q61.How well or badly is the health sector doing in improving health services?**

Choose only one option:

|                       |                                  |
|-----------------------|----------------------------------|
| <input type="radio"/> | Very badly                       |
| <input type="radio"/> | Fairly badly                     |
| <input type="radio"/> | Fairly well                      |
| <input type="radio"/> | Very well                        |
| <input type="radio"/> | Don't know or I have never heard |

## Political affiliation

[ Q62presid\_elec ]

**Q62.If presidential elections were tomorrow, would you like a change in government?**

Choose only one option:

|                       |            |
|-----------------------|------------|
| <input type="radio"/> | Yes        |
| <input type="radio"/> | No         |
| <input type="radio"/> | Don't know |
| <input type="radio"/> | Refused    |

[ Q63rate\_govt ]

**Q63.How well do you think the current government doing in performing their duties?**

Choose only one option:

|                       |                                  |
|-----------------------|----------------------------------|
| <input type="radio"/> | Very badly                       |
| <input type="radio"/> | Fairly badly                     |
| <input type="radio"/> | Fairly well                      |
| <input type="radio"/> | Very well                        |
| <input type="radio"/> | Don't know or I have never heard |

## Health insurance

[ Q64\_insur ]

**Q64. Zambia has launched the National Health Insurance for Zambian Households to access health services without financial hardship. Do you currently have any health insurance**

Choose only one option:

|                       |     |
|-----------------------|-----|
| <input type="radio"/> | Yes |
| <input type="radio"/> | No  |

• Relevant when:

Q64. Zambia has launched the National Health Insurance for Zambian Households to access health services without financial hardship. Do you currently have any health insurance = Yes.

[ Q64a\_typ ]

**Q64a.What type of health insurance**

Choose only one option:

|                       |                                         |
|-----------------------|-----------------------------------------|
| <input type="radio"/> | National Health Insurance               |
| <input type="radio"/> | Private health insurance                |
| <input type="radio"/> | Employer-based                          |
| <input type="radio"/> | Community-based/Mutual Health Insurance |
| <input type="radio"/> | Other                                   |

• Relevant when:

Q64a.What type of health insurance = Other.

[ Q64b\_typ\_oth ]

**Q64b.Specify other**

• Relevant when:

$Q64. \text{ Zambia has launched the National Health Insurance for Zambian Households to access health services without financial hardship. Do you currently have any health insurance} = \text{Yes}$ .

[ Q64c\_card ]

**Q64c. May I please see your insurance card?**

Choose only one option:

|                       |                    |
|-----------------------|--------------------|
| <input type="radio"/> | Yes, card observed |
| <input type="radio"/> | No refused         |
| <input type="radio"/> | Did not have it    |

• Relevant when:

$\text{Number drawn for experiemental selection} \leq 0.5$ .

[ notselected ]

**Note: Household was not selected for insurance game**

• Relevant when:

$\text{Number drawn for experiemental selection} > 0.5 \ \&\& \ Q64. \text{ Zambia has launched the National Health Insurance for Zambian Households to access health services without financial hardship. Do you currently have any health insurance} = \text{No}$ .

## Health insurance Exercise

[ Q65game ]

**Q65. We have developed a little game that illustrates how insurance works in practice. Would you be willing to play a few rounds of this game with me?"**

Choose only one option:

|                       |     |
|-----------------------|-----|
| <input type="radio"/> | Yes |
| <input type="radio"/> | No  |

• Relevant when:

$Q65. \text{ We have developed a little game that illustrates how insurance works in practice. Would you be willing to play a few rounds of this game with me?"} = \text{Yes}$ .

[ r1\_healthy ]

**Game 1: how many of the 12 cards drawn were healthy cards?**

- Relevant when:

Q65. We have developed a little game that illustrates how insurance works in practice. Would you be willing to play a few rounds of this game with me?" = Yes .

[ r1\_kids ]

**..how many child sickness?**

- Relevant when:

Q65. We have developed a little game that illustrates how insurance works in practice. Would you be willing to play a few rounds of this game with me?" = Yes .

[ r1\_physio ]

**..how many physio events?**

- Relevant when:

Q65. We have developed a little game that illustrates how insurance works in practice. Would you be willing to play a few rounds of this game with me?" = Yes .

[ r1\_unknown ]

**..how many unknown problems?**

- Relevant when:

Q65. We have developed a little game that illustrates how insurance works in practice. Would you be willing to play a few rounds of this game with me?" = Yes .

[ r1\_major ]

**..how many major events?**

- Relevant when:

Q65. We have developed a little game that illustrates how insurance works in practice. Would you be willing to play a few rounds of this game with me?" = Yes .

[ r2\_healthy ]

**Game 2: how many of the 12 cards drawn were healthy cards?**

- Relevant when:

Q65. We have developed a little game that illustrates how insurance works in practice. Would you be willing to play a few rounds of this game with me?" = Yes .

[ r2\_kids ]

**..how many child sickness?**

- Relevant when:

Q65. We have developed a little game that illustrates how insurance works in practice. Would you be willing to play a few rounds of this game with me?" = Yes .

[ r2\_physio ]

**..how many physio events?**

- Relevant when:

Q65. We have developed a little game that illustrates how insurance works in practice. Would you be willing to play a few rounds of this game with me?" = Yes .

[ r2\_unknown ]

**..how many unknown problems?**

- Relevant when:

Q65. We have developed a little game that illustrates how insurance works in practice. Would you be willing to play a few rounds of this game with me?" = Yes .

[ r2\_major ]

**..how many major events?**

- Relevant when:

Q64. Zambia has launched the National Health Insurance for Zambian Households to access health services without financial hardship. Do you currently have any health insurance = No .

[ Q66pay ]

**Q66. How much would you be willing to pay to get health insurance per month for yourself?**

- Relevant when:

Q64. Zambia has launched the National Health Insurance for Zambian Households to access health services without financial hardship. Do you currently have any health insurance = No.

[ Q66a\_pay ]

**Q66a. How much would you be willing to pay to get health insurance per month for entire household?**

- Relevant when:

Q66a. How much would you be willing to pay to get health insurance per month for entire household? > 0.

[ Q66b.hhnum ]

**Q66b. How many dependants do you have?**

- Relevant when:

Q64. Zambia has launched the National Health Insurance for Zambian Households to access health services without financial hardship. Do you currently have any health insurance = No && Q66a. How much would you be willing to pay to get health insurance per month for entire household? > 0.

[ Q67\_fees ]

**Q67. Would you rather pay monthly fees or annual fees?**

Choose only one option:

|                       |          |
|-----------------------|----------|
| <input type="radio"/> | Monthly  |
| <input type="radio"/> | Annually |
| <input type="radio"/> | Other    |

- Relevant when:

Q67. Would you rather pay monthly fees or annual fees? = Other.

[ Q67a\_oth ]

**Q67a. Other specify**



• Relevant when:

Q67.Would you rather pay monthly fees or annual fees? = .

[ Q67a\_ann ]

**Q67b. If annual, which month would you prefer to pay the annual fee?**

Choose only one option:

|                       |           |
|-----------------------|-----------|
| <input type="radio"/> | January   |
| <input type="radio"/> | Februrary |
| <input type="radio"/> | March     |
| <input type="radio"/> | April     |
| <input type="radio"/> | May       |
| <input type="radio"/> | June      |
| <input type="radio"/> | July      |
| <input type="radio"/> | August    |
| <input type="radio"/> | September |
| <input type="radio"/> | October   |
| <input type="radio"/> | November  |
| <input type="radio"/> | December  |

• Relevant when:

Q66.How much would you be willing to pay to get health insurance per month for yourself? > 0.

[ Q68 ]

**Q68.Based on the 1% of your monthly income, how much will you pay for health insurance each month?**

• Relevant when:

Q64. Zambia has launched the National Health Insurance for Zambian Households to access health services without financial hardship. Do you currently have any health insurance = .

[ Q68\_reg ]

**Q68.As part of this project, we offer all respondents support with enrollment. If you are interested, we can register you on the scheme's website. We will need your personal details, NRC and monthly income. Will you enroll in the scheme if I help you with the registration process or explain how the scheme works?**

Choose only one option:

|                       |     |
|-----------------------|-----|
| <input type="radio"/> | Yes |
| <input type="radio"/> | No  |

• Relevant when:

Q68.As part of this project, we offer all respondents support with enrollment. If you are interested, we can register you on the scheme's website. We will need your personal details, NRC and monthly income. Will you enroll in the scheme if I help you with the registration process or explain how the scheme works? = No.

[ Q69\_reason ]

**Q69.What is the main reason you will not enroll?**

Choose only one option:

|                       |                                  |
|-----------------------|----------------------------------|
| <input type="radio"/> | Cannot afford the premium        |
| <input type="radio"/> | Do not need insurance            |
| <input type="radio"/> | Poor quality of care             |
| <input type="radio"/> | Do not trust government programs |
| <input type="radio"/> | Do not understand the scheme     |
| <input type="radio"/> | None                             |
| <input type="radio"/> | Other                            |

• Relevant when:

Q69.What is the main reason you will not enroll? = Other.

[ Q69a\_oth ]

**Q69a.Specify other**

• Relevant when:

Q69.What is the main reason you will not enroll? ≠ None  Q68.As part of this project, we offer all respondents support with enrollment. If you are interested, we can register you on the scheme's website. We will need your personal details, NRC and monthly income. Will you enroll in the scheme if I help you with the registration process or explain how the scheme works? = Yes  Q64. Zambia has launched the National Health Insurance for Zambian Households to access health services without financial hardship. Do you currently have any health insurance = Yes.

[ Q70\_reason ]

**Q70.Is there another reason you will not enroll?**

Choose only one option:

|                       |                                  |
|-----------------------|----------------------------------|
| <input type="radio"/> | Cannot afford the premium        |
| <input type="radio"/> | Do not need insurance            |
| <input type="radio"/> | Poor quality of care             |
| <input type="radio"/> | Do not trust government programs |
| <input type="radio"/> | Do not understand the scheme     |
| <input type="radio"/> | None                             |
| <input type="radio"/> | Other                            |

• Relevant when:

Q70.Is there another reason you will not enroll? = Other .

[ Q70a\_oth ]

**Q70a.Specify other**

• Relevant when:

Q70.Is there another reason you will not enroll? ≠ None || Q68.As part of this project, we offer all respondents support with enrollment. If you are interested, we can register you on the scheme's website. We will need your personal details, NRC and monthly income. Will you enroll in the scheme if I help you with the registration process or explain how the scheme works? = Yes || Q64. Zambia has launched the National Health Insurance for Zambian Households to access health services without financial hardship. Do you currently have any health insurance = Yes .

[ Q71\_reason ]

**Q71.Is there another reason you will not enroll?**

Choose only one option:

|                       |                                  |
|-----------------------|----------------------------------|
| <input type="radio"/> | Cannot afford the premium        |
| <input type="radio"/> | Do not need insurance            |
| <input type="radio"/> | Poor quality of care             |
| <input type="radio"/> | Do not trust government programs |
| <input type="radio"/> | Do not understand the scheme     |
| <input type="radio"/> | None                             |
| <input type="radio"/> | Other                            |

• Relevant when:

Q71.Is there another reason you will not enroll? = Other .

[ Q71\_oth ]

**Q71a.Specify other**

[ telephone ]

**Telephone number please?**
